# Supplementary material
Source: PubMed Central journal article supplement (PMC3488166)

# Supplementary Figure S1

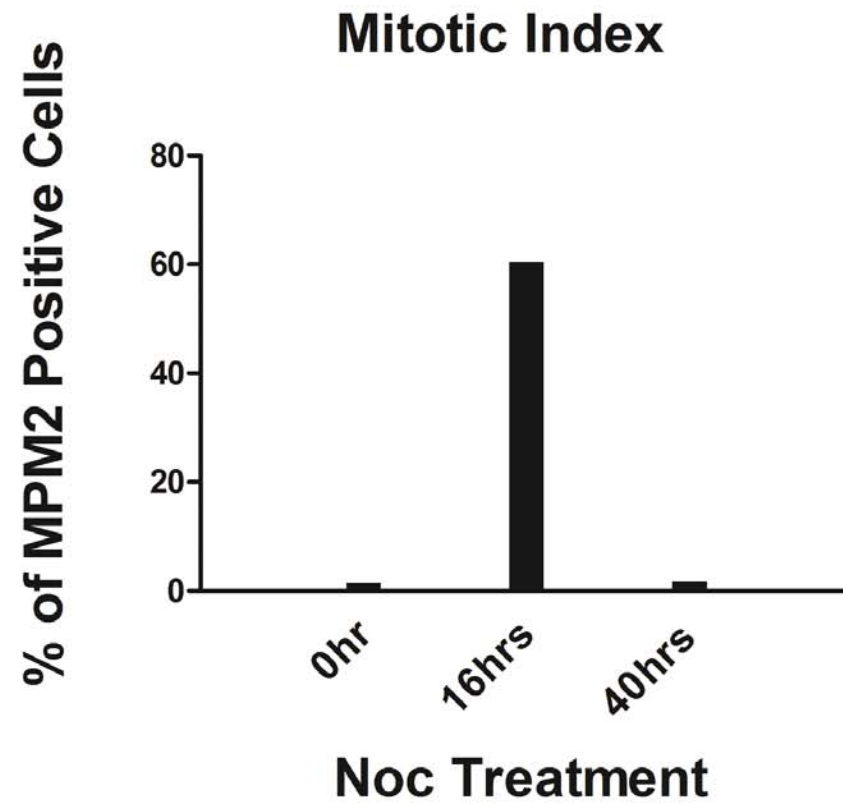

Supplement: NIHMS407020-supplement-3.pdf [file NIHMS407020-supplement-3.pdf]

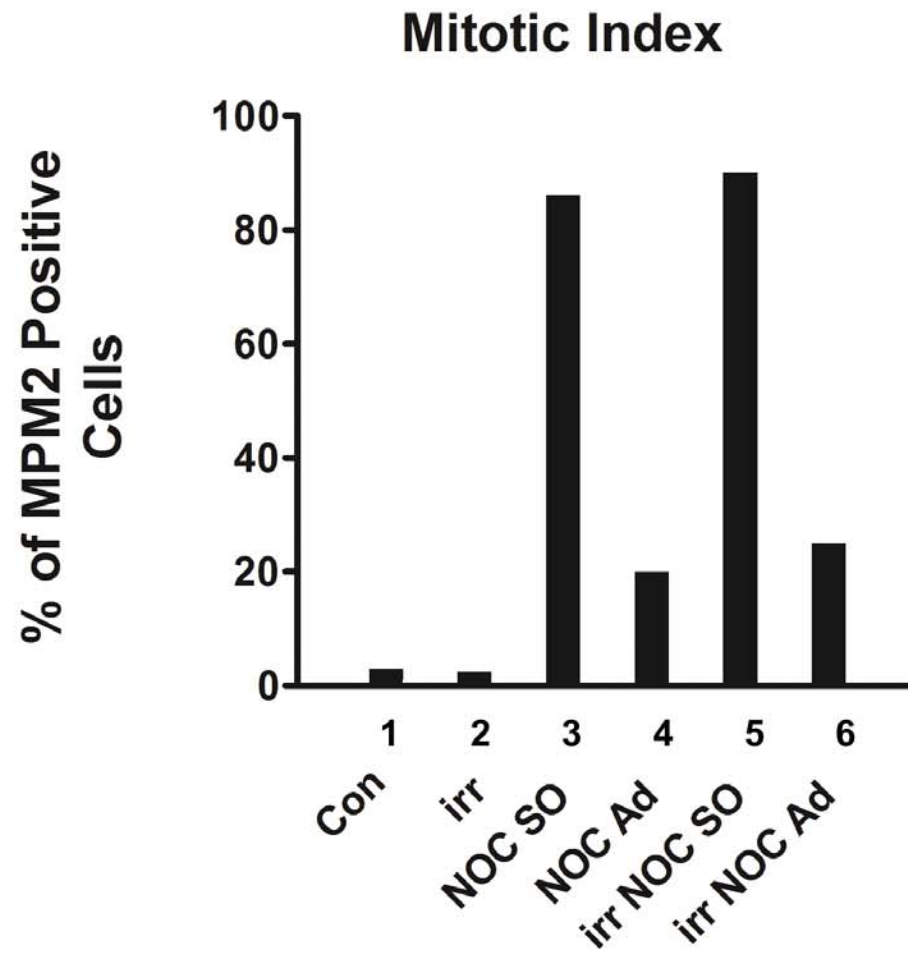

Supplement: NIHMS407020-supplement-4.pdf [file NIHMS407020-supplement-4.pdf]

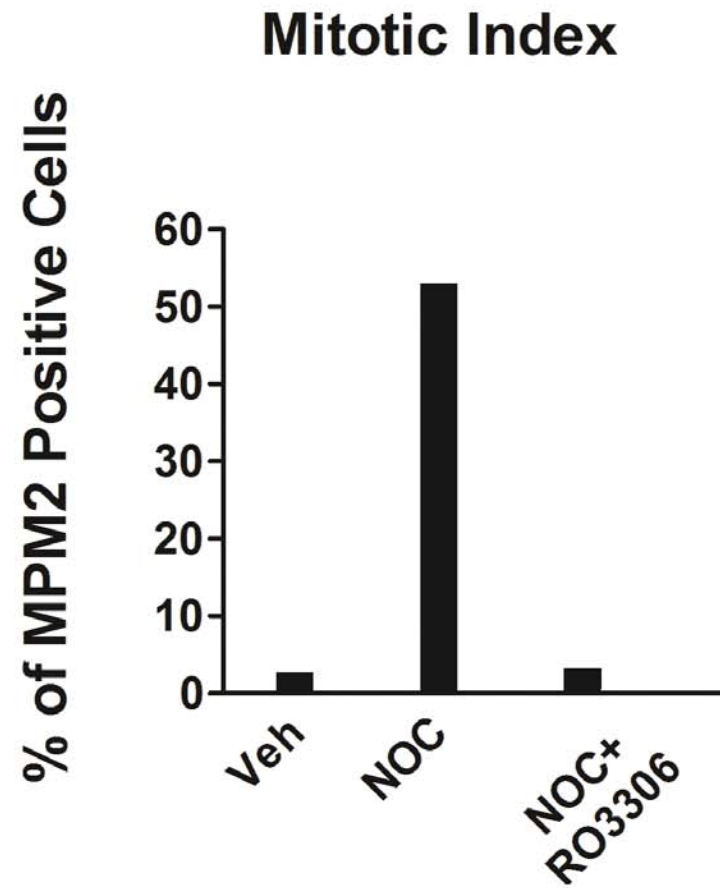

Supplement: NIHMS407020-supplement-5.pdf [file NIHMS407020-supplement-5.pdf]

# Supplementary Figure S4

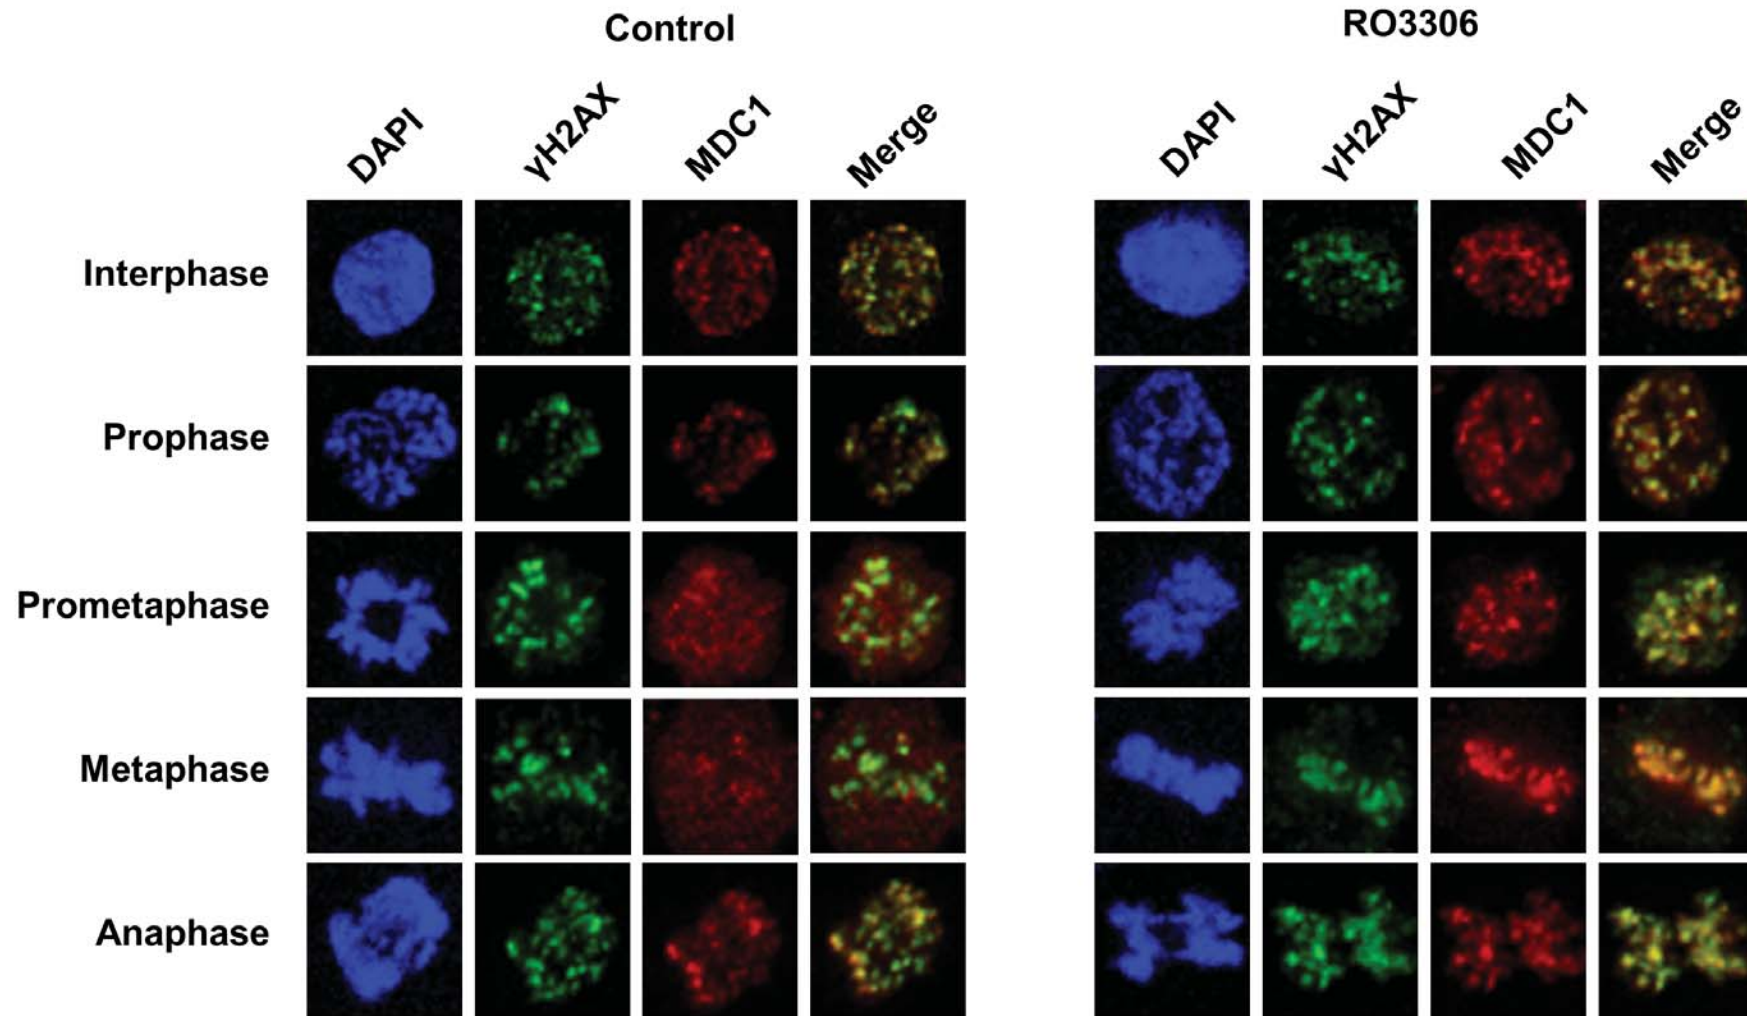

Supplement: NIHMS407020-supplement-6.pdf [file NIHMS407020-supplement-6.pdf]

# Supplementary Figure S5

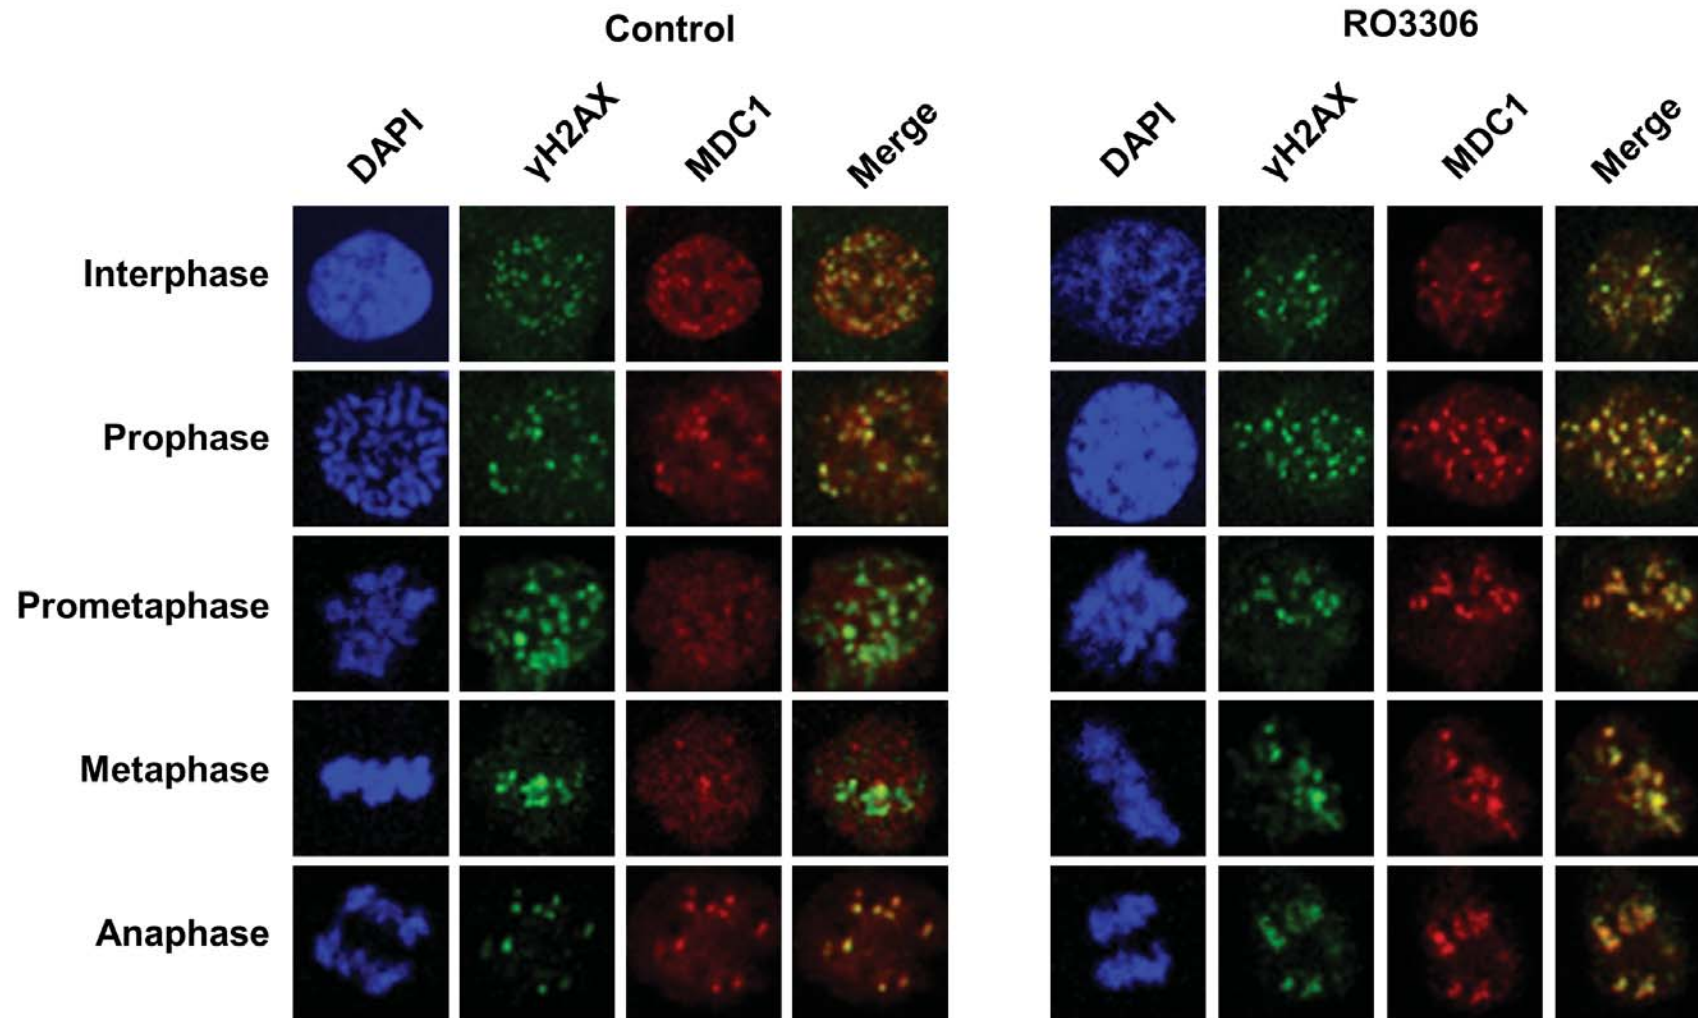

Supplement: NIHMS407020-supplement-7.pdf [file NIHMS407020-supplement-7.pdf]

# Supplementary Figure S6

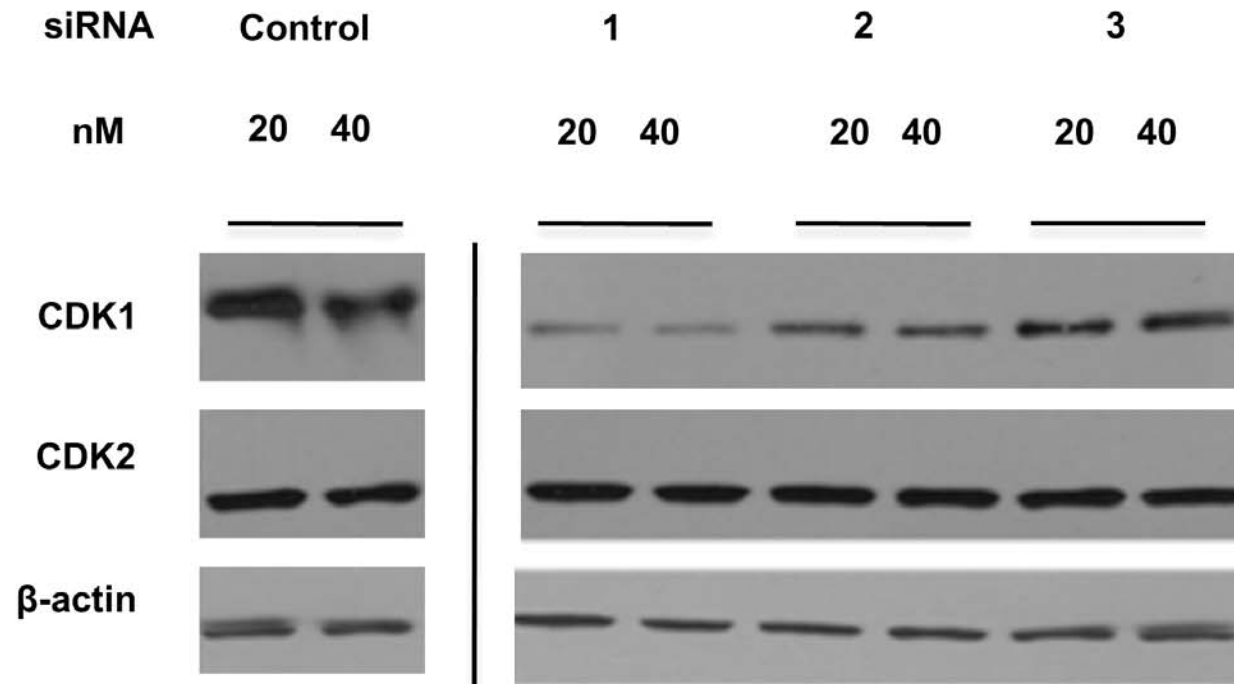

Supplement: NIHMS407020-supplement-8.pdf [file NIHMS407020-supplement-8.pdf]
